# Supplementary material
Source: publisher figshare collection journal article supplement (https://acs.figshare.com/ndownloader/files/4290607)
Supplement: Supplementary file 1 [file 4290607]

**Table S1:** Initial (default) EVB parameters. See Fig. 4 in the main text for the definition and atom numbering in the different VB states.

- i. Partial atomic charges of the reacting part (in fraction of an elementary charge) in the different VB states for calculating electrostatic interactions by  $E_{elec} = 332 \frac{q_i q_j}{r_{ij}} \left(1 - e^{-4r_{ij}^2}\right)$ .

|          | Cl(1)  | H(3,4,5) | C(2)   | Cl(6)  |
|----------|--------|----------|--------|--------|
| State I  | -0.168 | 0.200    | -0.438 | -0.994 |
| State II | -0.994 | 0.200    | -0.438 | -0.168 |

- ii. Bond parameters for the covalent bonds of the reacting part in the different VB states. All bonds are Morse bonds, where  $E_{bond} = D(1 - e^{-\beta(r-r_0)})^2$ .

|      | D (kcal mol <sup>-1</sup> ) | r <sub>0</sub> (Å) | β, (Å <sup>-1</sup> ) |
|------|-----------------------------|--------------------|-----------------------|
| C-Cl | 79                          | 1.82               | 0.8                   |
| C-H  | 100.4                       | 1.10               | 2.0                   |

- iii. Angle parameters for the bending of the adjacent covalent bonds in the reacting part in the different VB states, where  $E_{angle} = K_\theta(\theta - \theta_0)^2$ , and no bond-angle coupling is activated.

|               | K <sub>θ</sub> , (kcal rad <sup>-2</sup> mol <sup>-1</sup> ) | Θ (rad) |
|---------------|--------------------------------------------------------------|---------|
| H-C-H, H-C-Cl | 50                                                           | 1.911   |
| Cl-C-Cl       | 17                                                           | 3.142   |

- iv. VdW parameters for atom pairs in the reactive part, which are bonded in one of the VB states. Here,  $E_{VDW} = \frac{A}{r^{12}} - \frac{B}{r^6} + Ce^{-\beta \cdot r}$ , and A and B are zero.

|                      | C (kcal mol <sup>-1</sup> ) | β (Å <sup>-1</sup> ) |
|----------------------|-----------------------------|----------------------|
| Cl <sup>-</sup> ---C | 69999                       | 4                    |
| Cl <sup>-</sup> ---H | 12000                       | 3.6                  |

- v. VdW parameters for atom pairs in the reactive part, which are never bonded in any VB state. Here,  $E_{VDW} = \frac{A}{r^{12}} - \frac{B}{r^6}$ , and B is zero.

|                       | A (kcal·mol <sup>-1</sup> ·Å <sup>12</sup> ) |
|-----------------------|----------------------------------------------|
| Cl <sup>-</sup> ---Cl | 1000000                                      |

- vi. Screening term to account for the inductive interaction between the  $\text{Cl}^{\text{---}}\text{C}$  atom pair, using the relationship  $E_{\text{screen}} = -166 \frac{\sqrt{\alpha}}{r^4}$ .

|                                  | $\alpha$ ( $\text{\AA}^8$ ) |
|----------------------------------|-----------------------------|
| $\text{Cl}^{\text{---}}\text{C}$ | 0.6                         |

- vii. Gas-phase shifts of 13.96 kcal/mol were applied to both state 1 ( $\alpha_1$ ) and 2 ( $\alpha_2$ ), and the initial value of the mixing term ( $H_{12}$ ) before parameter refinement was 50 kcal/mol.

**Table S2:** Final (refined) EVB parameters. See Fig. 4 in the main text for the definition and atom numbering in the different VB states.

- i. Partial atomic charges of the reacting part (in fraction of an elementary charge) in the different VB states.  $E_{\text{elec}} = 332 \frac{q_i q_j}{r_{ij}} \left(1 - e^{-4.5 r_{ij}^2}\right)$

|          | Cl(1)  | H(3,4,5) | C(2)   | Cl(6)  |
|----------|--------|----------|--------|--------|
| State I  | -0.180 | 0.183    | -0.382 | -0.987 |
| State II | -0.987 | 0.183    | -0.382 | -0.180 |

- ii. Bond parameters for the covalent bonds of the reacting part in the different VB states. All bonds are Morse bonds, where  $E_{\text{bond}} = D(1 - e^{-\beta(r-r_0)})^2$ .

|      | D (kcal mol <sup>-1</sup> ) | $r_0$ ( $\text{\AA}$ ) | $\beta$ ( $\text{\AA}^{-1}$ ) |
|------|-----------------------------|------------------------|-------------------------------|
| C-Cl | 80                          | 1.806                  | 1.650                         |
| C-H  | 100.4                       | 1.093                  | 1.740                         |

- iii. Angle parameters for the bending of the adjacent covalent bonds in the reacting part in the different VB states. After parameter refinement, bond-angle coupling was activated between the H-C-Cl angle and the C-Cl bond, through the relationship  $\Phi_{ba} = \begin{cases} 1, & r \leq r_0 \\ 2e^{-\beta(r-r_0)} - e^{-2\beta(r-r_0)}, & r > r_0 \end{cases}$ , such that now  $E_{\text{angle}} = K_{\theta} (\theta - \theta_0)^2 \Phi_{ba}$ .

|        | $K_{\theta}$ (kcal rad <sup>-2</sup> mol <sup>-1</sup> ) | $\Theta$ (rad) |
|--------|----------------------------------------------------------|----------------|
| H-C-Cl | 25.4                                                     | 1.907          |
| H-C-H  | 35.5                                                     | 1.914          |
| Cl-CCl | 17                                                       | 3.142          |

- iv. VdW parameters for atom pairs in the reactive part, where  $E_{\text{VDW}} = \frac{A}{r^{12}} - \frac{B}{r^6}$ .

|                       | A (kcal mol <sup>-1</sup> Å <sup>12</sup> ) | B (kcal mol <sup>-1</sup> Å <sup>6</sup> ) |
|-----------------------|---------------------------------------------|--------------------------------------------|
| Cl <sup>-</sup> ---C  | 119246                                      | 235                                        |
| Cl <sup>-</sup> ---H  | 75848                                       | 120                                        |
| Cl <sup>-</sup> ---Cl | 126247162                                   | 8306                                       |

- v. After refinement, gas-phase shifts of -1.05 kcal/mol were applied to both state 1 ( $\alpha_1$ ) and 2 ( $\alpha_I$ ). Additionally, the best form for the mixing term (see main text) was found to be  $H_{12} = A \exp(-\mu(r_{12} - r_{26})^2)$ , where  $r_{12}$  and  $r_{26}$  are the distances between atoms 1 and 2, and 2 and 6, respectively. Here,  $A=37$  kcal/mol and  $\alpha=1.45$ .
